# Supplementary material for: A genome-wide assessment of stages of elevational parapatry in Bornean passerine birds reveals no introgression: implications for processes and patterns of speciation
Source: PubMed Central journal article supplement (PMC5438588; doi:10.7717/peerj.3335), 2017-05-18
Supplement: peerj-05-3335-s001.pdf [file peerj-05-3335-s001.pdf]

# A genome-wide assessment of stages of elevational parapatry in Bornean passerine birds reveals no introgression: implications for processes and patterns of speciation

## Supplementary Tables and Figures

Supplementary Figure 1. Number of SNPs per locus in the *Arachnothera* dataset.

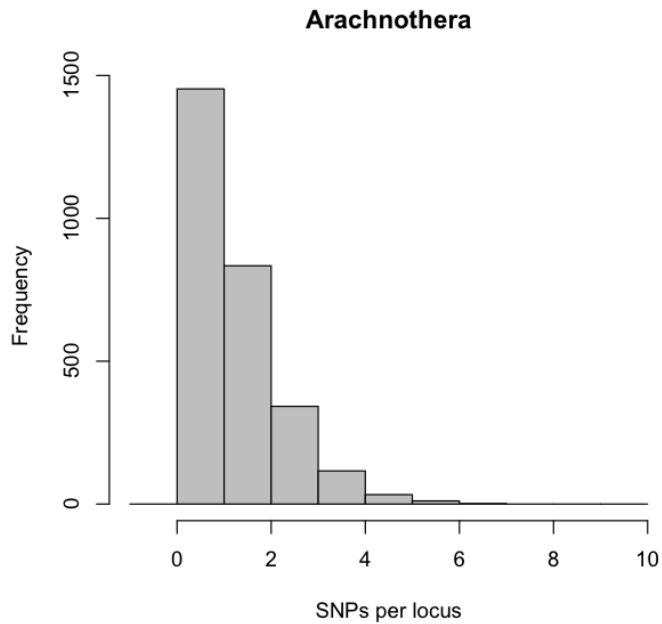

Supplementary Figure 2. Number of SNPs per locus in the *Chloropsis* dataset.

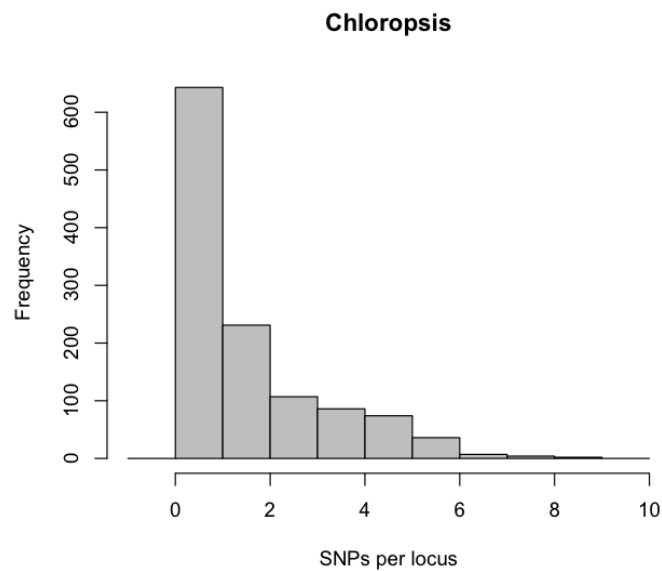

Supplementary Figure 3. Number of SNPs per locus in the Enicurus dataset.

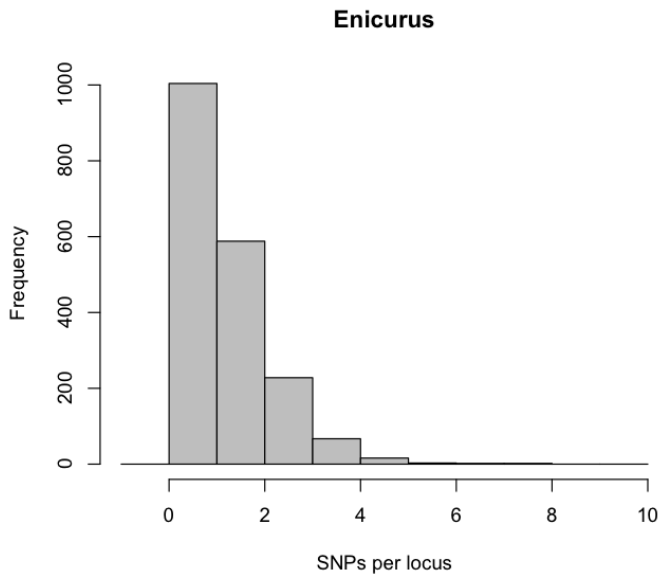

Supplementary Figure 4. Variation in population genetic differentiation ( $F_{ST}$ ) between highland and lowland populations of each taxon using different SNP datasets. The parameters that varied in SNP calling were N (number of mismatches allowed between individuals when creating stacks) and m (minimum stack depth for a locus and associated SNPs to be included). The restrictive dataset used the settings [N5, m5, and tested for physical linkage and selection (see main manuscript)].

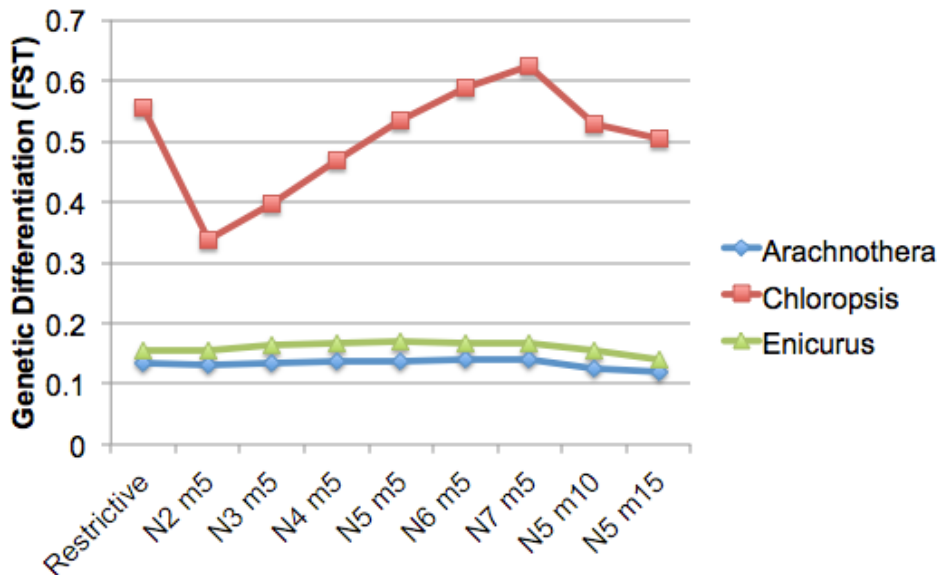

Supplementary Figure 5. Patterns of polymorphisms in *Arachnothera* with the different datasets as described in Supplementary Figure 4.

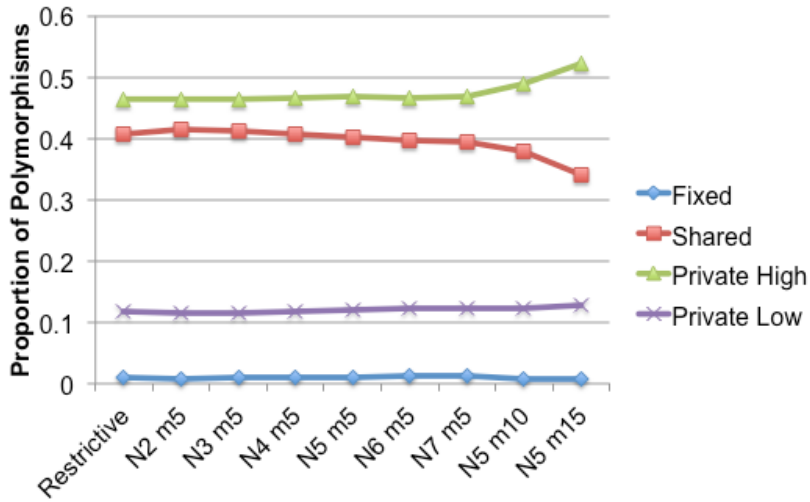

Supplementary Figure 6. STRUCTURE results for *Arachnothera* in the nine datasets described in Supplementary Figure 4. Shown are the assignment probabilities of individuals to the highland group. Open circles are the values presented in the main manuscript, with all other datasets represented by smaller closed circles.

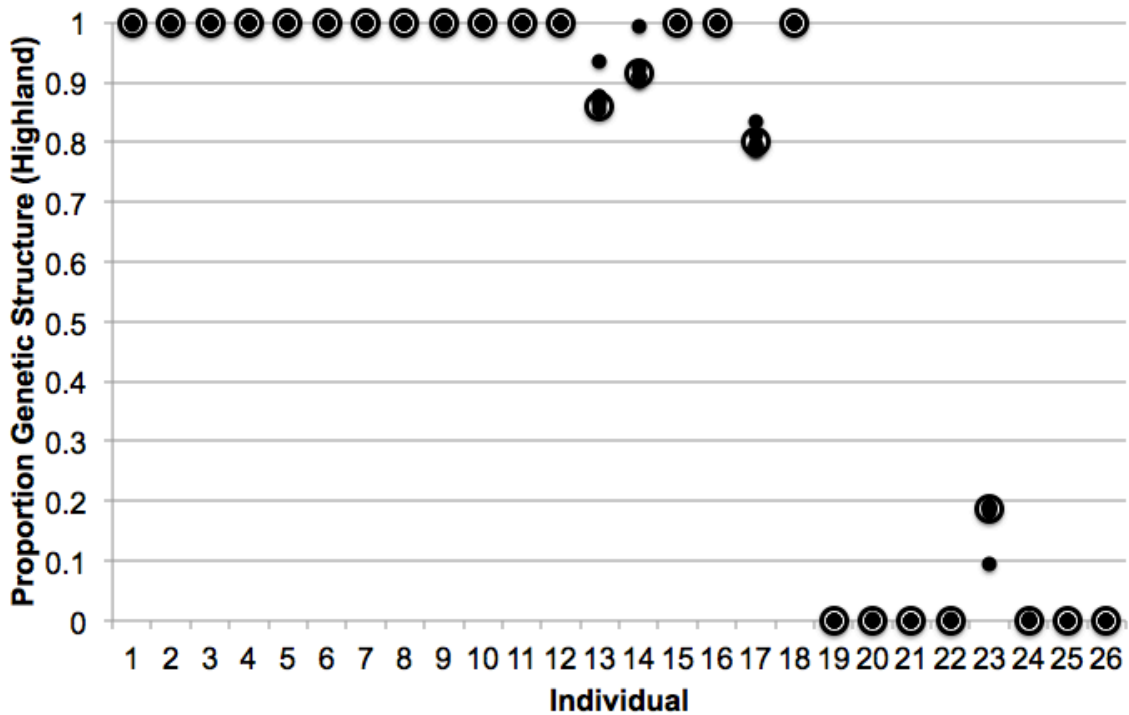

Supplementary Figure 7. Patterns of polymorphisms in *Enicurus* with the different datasets as described in Supplementary Figure 4.

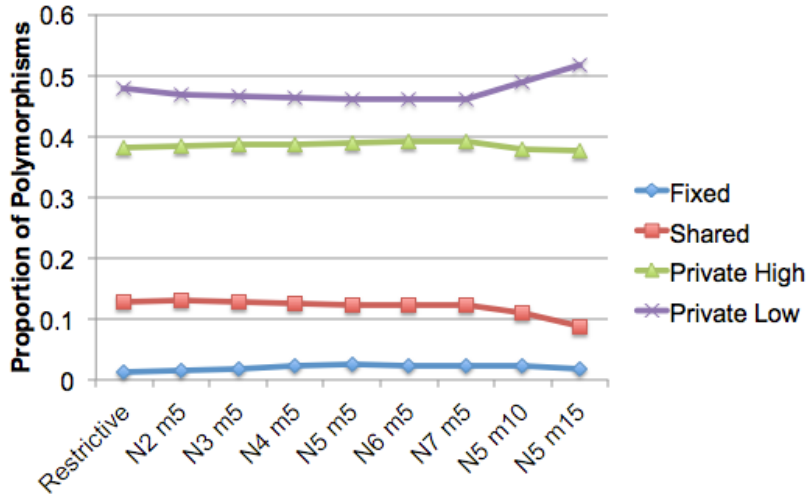

Supplementary Figure 8. STRUCTURE results for *Enicurus* in the nine datasets described in Supplementary Figure 4. Shown are the assignment probabilities of individuals to the highland group. Open circles are the values presented in the main manuscript, with all other datasets represented by smaller closed circles. The individuals with the largest variance in results (9, 12, and 14) were changes when the minimum stack depth (m) was changed to 15, resulting in far fewer SNPs (~150) and indicating less power to differentiate some of the individuals.

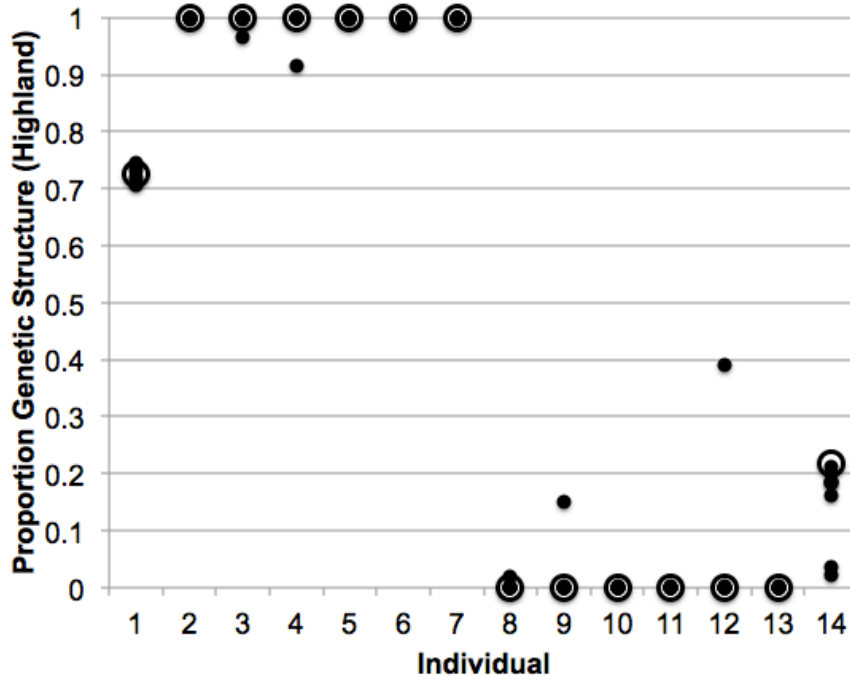

Supplementary Figure 9. Patterns of polymorphisms in *Chloropsis* with the different datasets as described in Supplementary Figure 4.

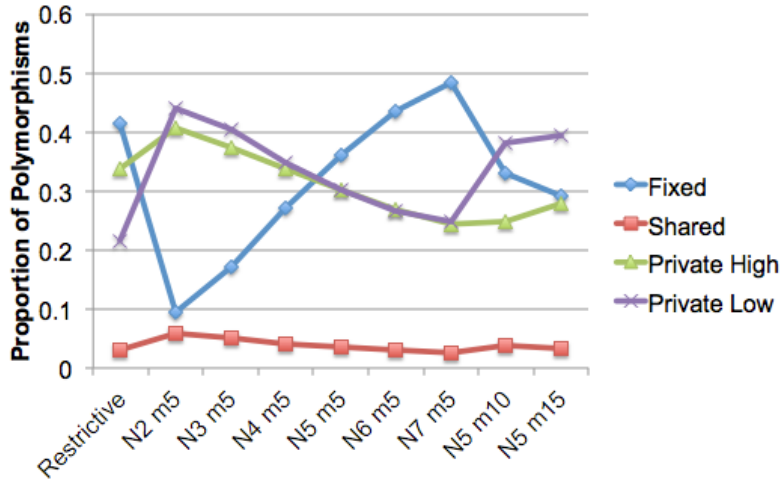

Supplementary Figure 10. STRUCTURE results for *Chloropsis* in the nine datasets described in Supplementary Figure 4. Shown are the assignment probabilities of individuals to the highland group. Open circles are the values presented in the main manuscript, with all other datasets represented by smaller closed circles. Two individuals (4 and 5) showed high variation in results across datasets.

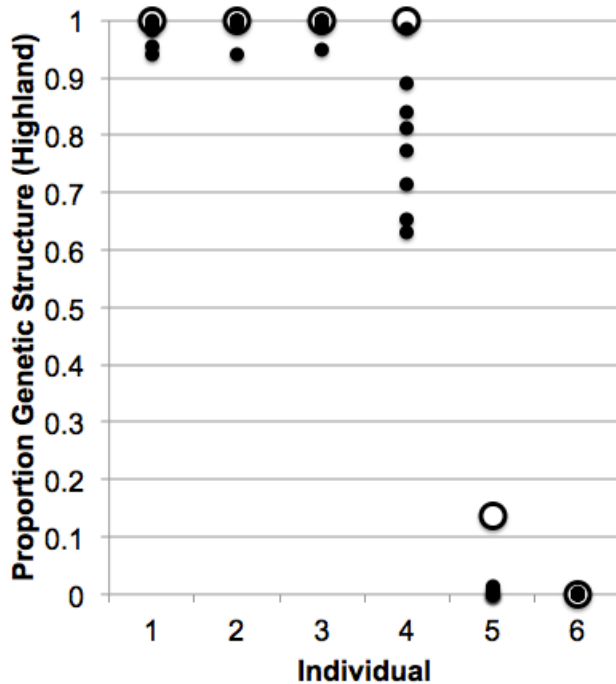

Supplementary Figure 11 – Log probability (blue) and delta K (red) for *Arachnothera*. Low probabilities at  $k = 1$  exclude it as a possibility for this species. This identified  $k = 2$ .

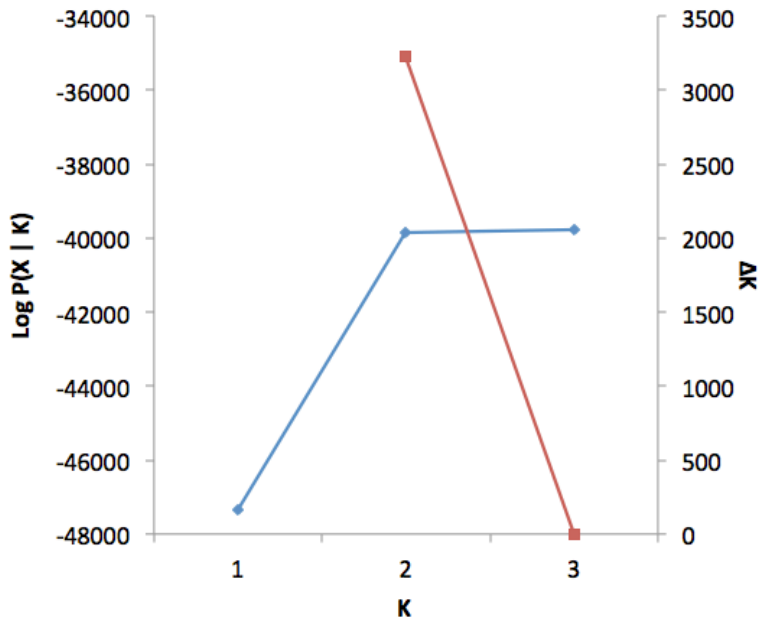

Supplementary Figure 12 – Log probability (blue) and delta K (red) for *Chloropsis*. Low probabilities at  $k = 1$  exclude it as a possibility for this species. This identified  $k = 2$ .

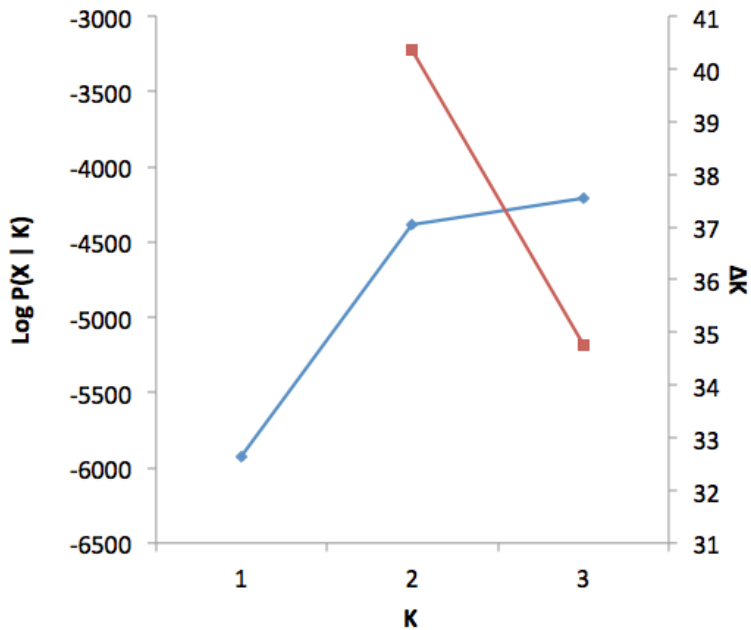

Supplementary Figure 13 – Log probability (blue) and delta K (red) for *Enicurus*. Low probabilities at  $k = 1$  exclude it as a possibility for this species. This identified  $k = 2$ .

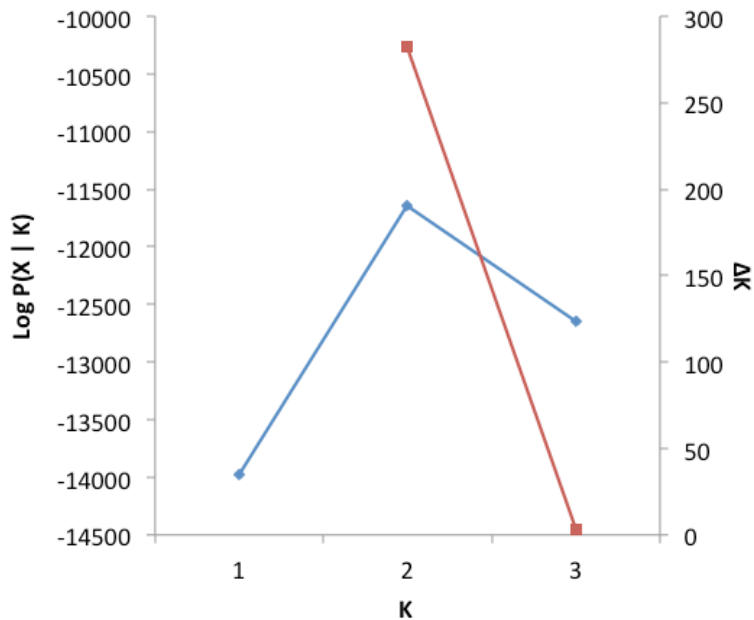

Supplementary Figure 14. Test to check if sample size was the driving force behind the high number of fixed differences in *Chloropsis*. Here, the *Arachnothera* and *Enicurus* datasets were subsampled (4 high elevation, 2 low) for 100 replicates, and their respective polymorphisms summarized. In no samples were the proportion of fixed differences similar to that seen in the empirical *Chloropsis* dataset.

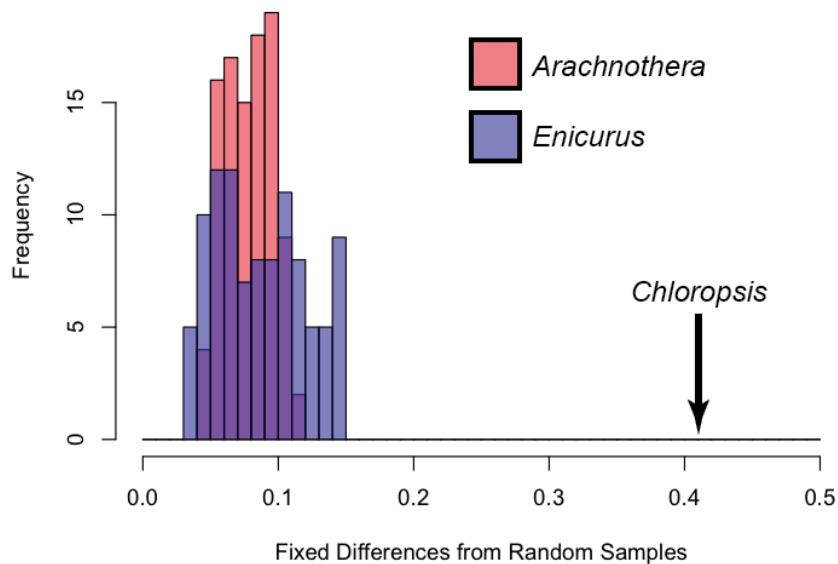

Supplementary Table 1. Results of three replicate runs of Migrate-N. All values are formatted as high elevation/low elevation values. Theta values are multiplied by 100.

|                     | Median      | Lower 95%   | Upper 95%   |
|---------------------|-------------|-------------|-------------|
| <i>Arachnothera</i> |             |             |             |
| Theta 1             | 0.353/0.287 | 0.013/0.000 | 0.667/0.560 |
| Theta 2             | 0.367/0.300 | 0.013/0.000 | 0.667/0.560 |
| Theta 3             | 0.393/0.447 | 0.013/0.000 | 0.667/0.560 |
| 2Nm 1               | 0.120/0.103 | 0.004/0.000 | 0.233/0.208 |
| 2Nm 2               | 0.131/0.101 | 0.005/0.000 | 0.243/0.196 |
| 2Nm 3               | 0.131/0.101 | 0.005/0.000 | 0.242/0.201 |
| <i>Chloropsis</i>   |             |             |             |
| Theta 1             | 0.300/0.287 | 0.000/0.000 | 0.573/0.547 |
| Theta 2             | 0.300/0.287 | 0.000/0.000 | 0.560/0.547 |
| Theta 3             | 0.300/0.287 | 0.000/0.000 | 0.573/0.547 |
| 2Nm 1               | 0.098/0.096 | 0.000/0.000 | 0.193/0.187 |
| 2Nm 2               | 0.095/0.093 | 0.000/0.000 | 0.181/0.183 |
| 2Nm 3               | 0.102/0.098 | 0.000/0.000 | 0.201/0.191 |
| <i>Enicurus</i>     |             |             |             |
| Theta 1             | 0.260/0.260 | 0.000/0.000 | 0.520/0.520 |
| Theta 2             | 0.260/0.260 | 0.000/0.000 | 0.520/0.520 |
| Theta 3             | 0.260/0.260 | 0.000/0.000 | 0.520/0.507 |
| 2Nm 1               | 0.091/0.090 | 0.000/0.000 | 0.185/0.184 |
| 2Nm 2               | 0.088/0.089 | 0.000/0.000 | 0.181/0.180 |
| 2Nm 3               | 0.090/0.092 | 0.000/0.000 | 0.186/0.183 |



Supplementary Table 2. Two-population dadi demographic modeling output. Abbreviations: arach = *Arachnothera*, enic = *Enicurus*, nu1 = population size of pop1 (relative to ancestral), nu2 = population size of pop2 (relative to ancestral), T = time since divergence, m12 = migration rate from pop2 into pop1, and m21 = migration rate from pop1 into pop2.

| Pop1       | Pop2      | Model                                | Replicate | Composite Likelihood | AIC     | Theta scaled (=4NeuL) | nu1  | nu2  | T    | m12  | m21  |
|------------|-----------|--------------------------------------|-----------|----------------------|---------|-----------------------|------|------|------|------|------|
| arach high | arach low | No divergence                        | 1         | -3574.78             | 7151.56 | 940                   |      |      |      |      |      |
| arach high | arach low | No divergence                        | 2         | -3574.78             | 7151.56 | 940                   |      |      |      |      |      |
| arach high | arach low | No divergence                        | 3         | -3574.78             | 7151.56 | 940                   |      |      |      |      |      |
| arach high | arach low | Split, then isolation with migration | 1         | -336.27              | 684.54  | 324.6                 | 4.96 | 1.1  | 1.69 | 0.15 | 0.33 |
| arach high | arach low | Split, then isolation with migration | 2         | -332.73              | 677.46  | 336.6                 | 4.97 | 1.27 | 1.45 | 0.15 | 0.29 |
| arach high | arach low | Split, then isolation with migration | 3         | -340.86              | 693.72  | 344.1                 | 4.98 | 0.91 | 1.55 | 0.17 | 0.48 |
| arach high | arach low | Split, then no migration             | 1         | -484.03              | 976.06  | 518.9                 | 4.4  | 1.02 | 0.52 |      |      |
| arach high | arach low | Split, then no migration             | 2         | -484.03              | 976.06  | 518.9                 | 4.4  | 1.01 | 0.52 |      |      |
| arach high | arach low | Split, then no migration             | 3         | -484.04              | 976.08  | 519.4                 | 4.36 | 1.02 | 0.52 |      |      |
| enic high  | enic low  | No divergence                        | 1         | -2689.3              | 5380.6  | 928.4                 |      |      |      |      |      |
| enic high  | enic low  | No divergence                        | 2         | -2689.3              | 5380.6  | 928.4                 |      |      |      |      |      |
| enic high  | enic low  | No divergence                        | 3         | -2689.3              | 5380.6  | 928.4                 |      |      |      |      |      |
| enic high  | enic low  | Split, then isolation with migration | 1         | -272.13              | 556.26  | 275.3                 | 2.17 | 4.89 | 2.16 | 0.15 | 0.04 |
| enic high  | enic low  | Split, then isolation with migration | 2         | -280.49              | 572.98  | 291.3                 | 1.75 | 4.99 | 2.04 | 0.22 | 0.07 |
| enic high  | enic low  | Split, then isolation with migration | 3         | -278.51              | 569.02  | 270.4                 | 2.16 | 4.93 | 2.23 | 0.16 | 0.02 |
| enic high  | enic low  | Split, then no migration             | 1         | -324.9               | 657.8   | 342.7                 | 2.28 | 4.96 | 1.3  |      |      |
| enic high  | enic low  | Split, then no migration             | 2         | -323.61              | 655.22  | 349.9                 | 2.16 | 4.92 | 1.26 |      |      |
| enic high  | enic low  | Split, then no migration             | 3         | -335.99              | 679.98  | 374.9                 | 1.62 | 4.99 | 1.18 |      |      |
